# Supplementary material
Source: PubMed Central journal article supplement (PMC3169817)
Supplement: mmc1.pdf [file mmc1.pdf]

The American Journal of Human Genetics, Volume 89

**Supplemental Data**

**Mutations in *IL36RN/IL1F5* Are Associated with the**

**Severe Episodic Inflammatory Skin Disease**

**Known as Generalized Pustular Psoriasis**

Alexandros Onoufriadis, Michael A. Simpson, Andrew E. Pink, Paola Di Meglio, Catherine H. Smith, Venu Pullabhatla, Jo Knight, Sarah L. Spain, Frank O. Nestle, A. David Burden, Francesca Capon, Richard C. Trembath, and Jonathan N. Barker

**Table S1. Summary Statistics for Exome Sequencing - Mapping and Coverage**

| <b>Sequenced Exomes</b>                   | <b>GPP-01 II:5</b> | <b>GPP-02 II:1</b> | <b>GPP-03II-2</b> | <b>GPP-04 I:1</b> | <b>GPP-05 I:1</b> |
|-------------------------------------------|--------------------|--------------------|-------------------|-------------------|-------------------|
| Uniquely mapped reads                     | 68594921           | 62009656           | 65314156          | 65646601          | 69407301          |
| Uniquely mapped to target +/- 150bp reads | 55198407           | 49208880           | 52015608          | 52627576          | 55268375          |
| Uniquely mapped to target reads           | 48215586           | 42753343           | 45238186          | 46191914          | 48396089          |
| CCDS bases with coverage >1               | 33260912           | 33449940           | 33362220          | 33361093          | 33494779          |
| CCDS bases with coverage >5               | 31312830           | 31533617           | 31431865          | 31514504          | 31787327          |
| CCDS bases with coverage >10              | 29670758           | 29801616           | 29772801          | 29904282          | 30254958          |
| CCDS bases with coverage >20              | 26782011           | 26684328           | 26794008          | 27052242          | 27593347          |
| Mean coverage                             | 65.06              | 57.86              | 61.16             | 62.63             | 65.71             |

Total number of mapped reads and resulting coverage of the CCDS exome.

**Table S2. Summary Statistics for Exome Sequencing - Variant Calling**

| Variant type                  | GPP-01 II:5 |       | GPP-02 II:1 |       | GPP-03 II:2 |       | GPP-04 I:1 |       | GPP-05 I:1 |       |
|-------------------------------|-------------|-------|-------------|-------|-------------|-------|------------|-------|------------|-------|
|                               | known       | novel | known       | novel | known       | novel | known      | novel | known      | novel |
| All variants                  | 22758       | 370   | 22678       | 275   | 22731       | 251   | 23120      | 281   | 22679      | 270   |
| heterozygous                  | 13665       | 357   | 13602       | 270   | 14234       | 248   | 14124      | 273   | 14037      | 266   |
| homozygous                    | 9093        | 13    | 9076        | 5     | 8497        | 3     | 8996       | 8     | 8642       | 4     |
| Indels                        | 16          | 531   | 365         | 8     | 358         | 7     | 362        | 9     | 356        | 11    |
| heterozygous                  | 14          | 277   | 164         | 7     | 167         | 7     | 154        | 8     | 167        | 11    |
| homozygous                    | 2           | 254   | 201         | 1     | 191         | 0     | 208        | 1     | 189        | 0     |
| 3n indels                     | 179         | 8     | 177         | 8     | 173         | 3     | 172        | 4     | 176        | 4     |
| heterozygous                  | 102         | 8     | 102         | 7     | 110         | 3     | 98         | 4     | 103        | 4     |
| homozygous                    | 77          | 0     | 75          | 1     | 63          | 0     | 74         | 0     | 73         | 0     |
| Non 3n indels                 | 196         | 10    | 188         | 3     | 185         | 4     | 190        | 5     | 180        | 7     |
| heterozygous                  | 65          | 8     | 62          | 2     | 57          | 4     | 56         | 4     | 64         | 7     |
| homozygous                    | 131         | 2     | 126         | 1     | 128         | 0     | 134        | 1     | 116        | 0     |
| Snvs                          | 19836       | 314   | 19752       | 225   | 19844       | 228   | 20203      | 243   | 19808      | 227   |
| heterozygous                  | 11984       | 306   | 11925       | 222   | 12511       | 226   | 12414      | 237   | 12370      | 225   |
| homozygous                    | 7852        | 8     | 7827        | 3     | 7333        | 2     | 7789       | 6     | 7438       | 2     |
| Synonymous_snvs               | 10238       | 108   | 10186       | 68    | 10267       | 78    | 10465      | 79    | 10279      | 75    |
| heterozygous                  | 6135        | 105   | 6033        | 66    | 6407        | 78    | 6364       | 77    | 6334       | 74    |
| homozygous                    | 4103        | 3     | 4153        | 2     | 3860        | 0     | 4101       | 2     | 3945       | 1     |
| Nonsynonymous_snvs            | 9598        | 206   | 9566        | 157   | 9577        | 150   | 9738       | 164   | 9529       | 152   |
| heterozygous                  | 5849        | 201   | 5892        | 156   | 6104        | 148   | 6050       | 160   | 6036       | 151   |
| homozygous                    | 3749        | 5     | 3674        | 1     | 3473        | 2     | 3688       | 4     | 3493       | 1     |
| Splice site (10bp)            | 2547        | 38    | 2561        | 42    | 2529        | 16    | 2555       | 29    | 2515       | 32    |
| heterozygous                  | 1514        | 35    | 1513        | 41    | 1556        | 15    | 1556       | 28    | 1500       | 30    |
| homozygous                    | 1033        | 3     | 1048        | 1     | 973         | 1     | 999        | 1     | 1015       | 2     |
| Transition:Transversion ratio | 3.04        | 3.32  | 3.07        | 3.06  | 3.06        | 2.87  | 3.06       | 2.91  | 3.14       | 2.8   |
| heterozygous                  | 3.12        | 3.36  | 3.09        | 3.06  | 3.12        | 2.83  | 3.05       | 2.82  | 3.15       | 2.81  |
| homozygous                    | 2.93        | 2.33  | 3.03        | 3     | 2.97        | n/a   | 3.07       | n/a   | 3.13       | 2     |

Numbers of variants of different classes identified by exome sequencing in the five sequenced cases.

**Table S3. Primer Sequences Used for Amplification and Sanger Sequencing of IL36RN**

| ID          | Sequence 5' to 3'    |
|-------------|----------------------|
| IL1F5-EX1-F | gctccgtggaggctgttc   |
| IL1F5-EX1-R | cacaatttcccagctgcaat |
| IL1F5-EX2-F | ggagacaaggctgtgctgtt |
| IL1F5-EX2-R | gcttagagcctggtttgtgc |
| IL1F5-EX3-F | ctgctgagaagcctcccttc |
| IL1F5-EX3-R | caaagctgcatcaacagaa  |
| IL1F5-EX4-F | ttctgttgatggcagctttg |
| IL1F5-EX4-R | ggtcaggtgccactaagtc  |
